# Supplementary material for: Tuning the oxidation state and magnetic and coordination behaviour of iron and cobalt complexes by O/S variation in mono-thio and dithio-oxamide chelating ligands
Source: Royal Society of Chemistry journal article supplement (doi:10.1039/c5nj00425j), 2015-01-01
Supplement: c5nj00425j1.pdf [file c5nj00425j1.pdf]

**Tuning the magnetic, oxidation state and coordination behaviour of Iron and Cobalt Complexes on O/S Variation in mono-thio and dithio-oxamide chelating ligands**

Luca Pilia, Davide Espa, Giorgio Concas, Francesco Congiu, Luciano Marchiò, Maria Laura Mercuri,

Angela Serpe and Paola Deplano

Supplementary Material

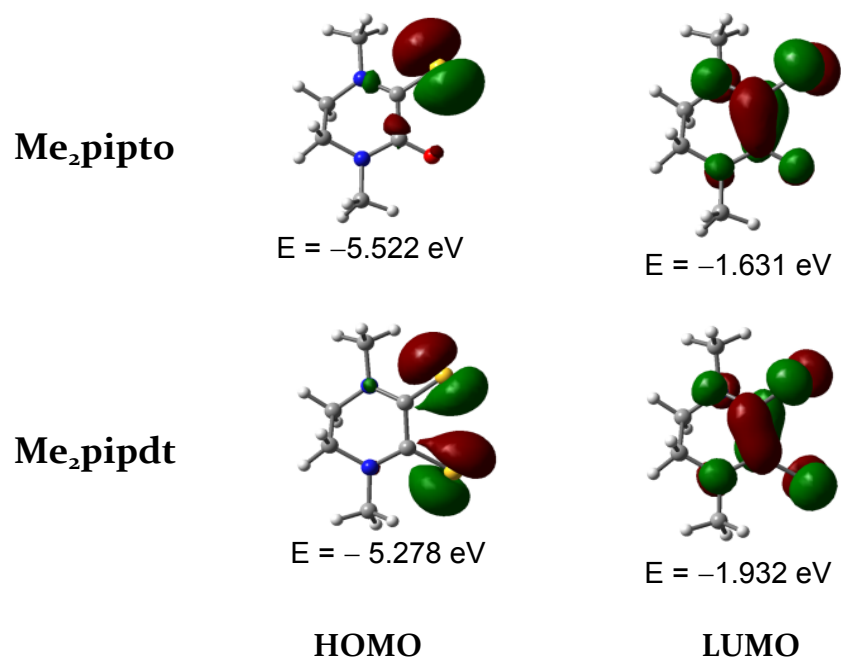

**Figure S1.** Drawing of HOMO and LUMO of Me<sub>2</sub>pipto and Me<sub>2</sub>pipdt ligands; the isosurfaces contour value is 0.04 and the energies are reported in electronvolts.

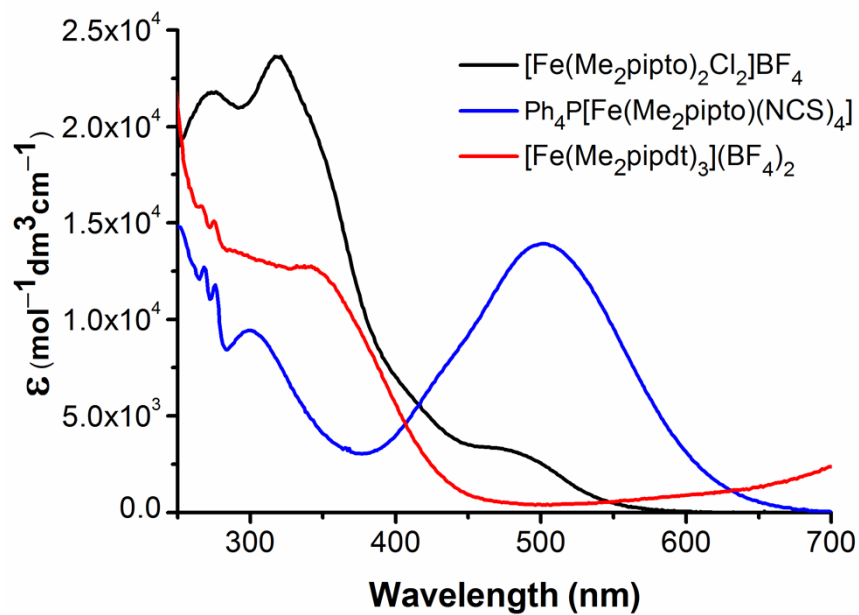

**Figure S2.** UV-vis spectra of complexes **1**, **4** and **5** in CH<sub>3</sub>CN solution.

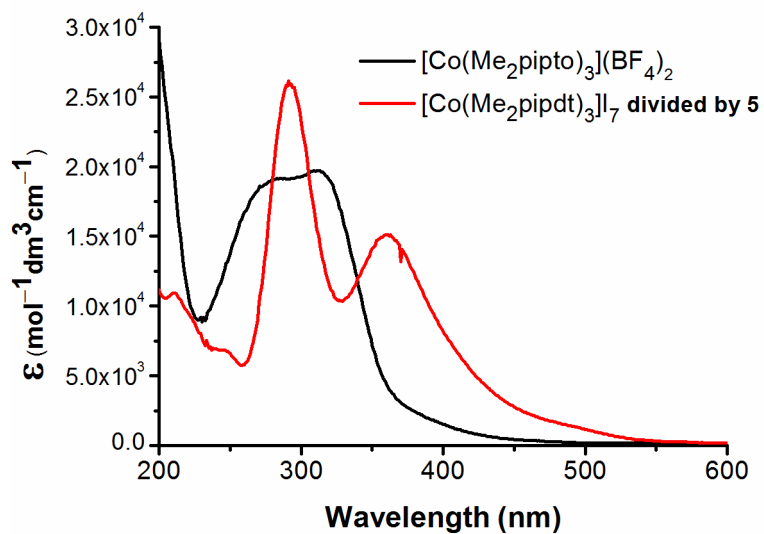

**Figure S3.** UV-vis spectra of complexes **3** and **7** in CH<sub>3</sub>CN solution.

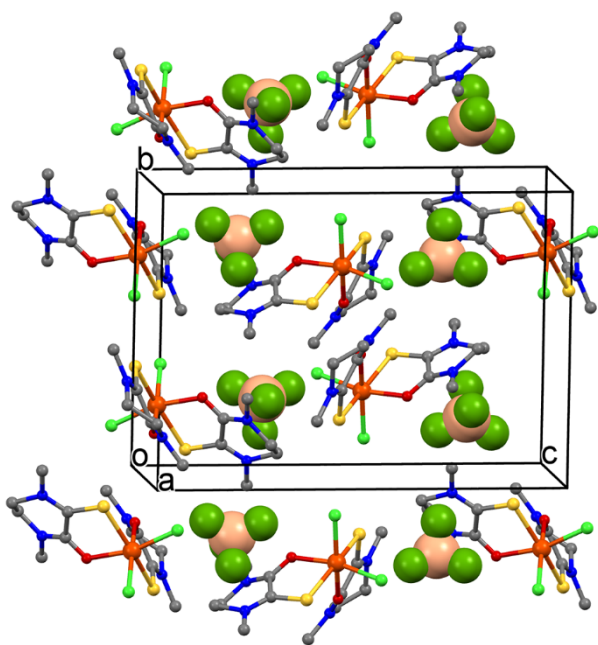

**Figure S4.** Crystal packing of [Fe(Me<sub>2</sub>pipto)<sub>2</sub>Cl<sub>2</sub>]<sub>2</sub>BF<sub>4</sub> (**1**) projected along the *a* axis.

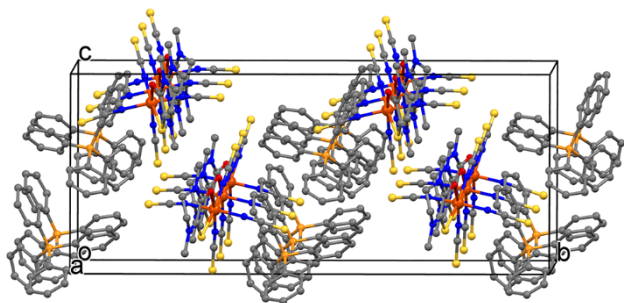

**Figure S5.** Crystal packing of  $\text{Ph}_4\text{P}[\text{Fe}(\text{Me}_2\text{pipto})(\text{NCS})_4]$  (**4**) projected along the  $a$  axis. The packing comprises alternate layers of complex molecules and  $\text{PPh}_4^+$  cations

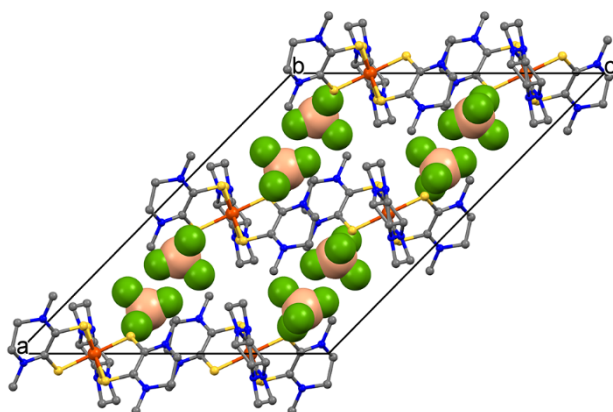

**Figure S6.** Crystal packing of  $[\text{Fe}(\text{Me}_2\text{pipdt})_3](\text{BF}_4)_2$  (**5**) projected along the  $b$  axis. The packing consists of layers of complex molecules with embedded  $\text{BF}_4^-$  anions.

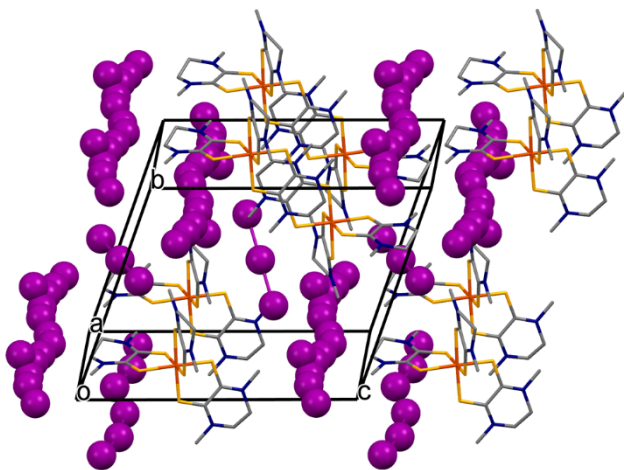

**Figure S7.** Crystal packing of  $[\text{Fe}(\text{Me}_2\text{pipdt})_3](\text{I}_3)_{1.8}(\text{I})_{0.2}$  (**6**) projected along the  $a$  axis. Iodine atoms are depicted as purple spheres whereas the complex  $[\text{Fe}(\text{pipdt})_3]^{3+}$  in stick representation. Structural channels containing disordered iodine-based fragments run parallel to the  $a$  axis.

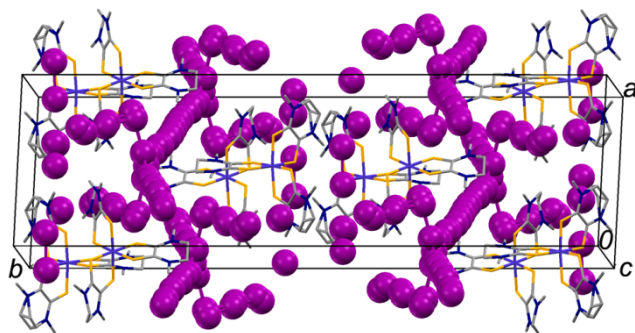

**Figure S8.** Crystal packing of  $[\text{Co}(\text{pipdt})_3]_2(\text{I}_3)_2(\text{I}_4)\cdot 2\text{I}_2$  (**7**) projected along the  $c$  axis. Iodine atoms are depicted as purple spheres whereas the complex  $[\text{Co}(\text{pipdt})_3]^{3+}$  in stick representation. Structural channels containing disordered iodine-based fragments run parallel to the  $c$  axis.

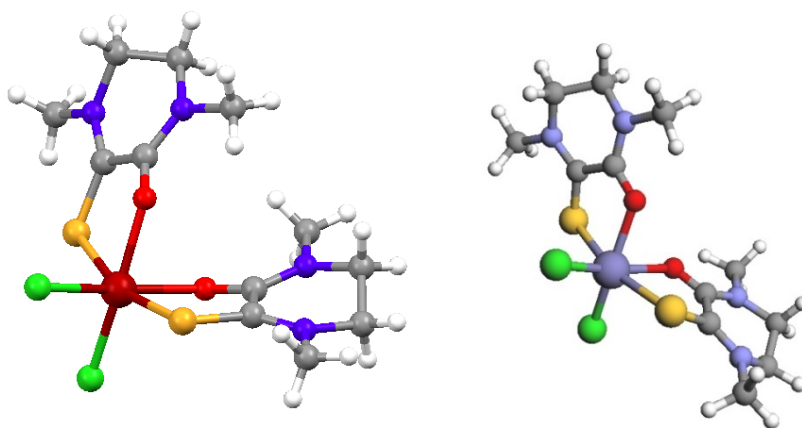

**Figure S9.** Comparison between the X-ray (left) and B3LYP/6-31G(d) calculated (right) structures of complex **1**.

**Table S1.** Comparison between experimental and *calculated*<sup>a</sup> bond lengths (Å) and angles (°) for **1**.

|          |                 |                |                  |
|----------|-----------------|----------------|------------------|
| Fe-S(11) | 2.5022(7)/2.585 | S(11)-Fe-O(21) | 78.13(4)/ 75.90  |
| Fe-S(12) | 2.4595(6)/2.585 | S(11)-Fe-Cl(2) | 88.26(2)/90.17   |
| Fe-O(21) | 2.101(1)/ 2.151 | S(11)-Fe-Cl(1) | 101.78(3)/98.38  |
| Fe-O(22) | 2.071(2)/ 2.151 | S(11)-Fe-S(12) | 163.30(2)/165.98 |
| Fe-Cl(1) | 2.2699(7)/2.224 | S(12)-Fe-O(22) | 80.08(4)/75.90   |

|                |                 |                |                  |
|----------------|-----------------|----------------|------------------|
| Fe-Cl(2)       | 2.2592(6)/2.224 | S(12)-Fe-O(21) | 87.37(4)/93.21   |
| C(11)-S(11)    | 1.675(2)/1.680  | S(12)-Fe-Cl(2) | 105.15(3)/98.38  |
| C(21)-O(21)    | 1.248(2)/1.245  | S(21)-Fe-Cl(1) | 87.13(2)/90.15   |
| C(12)-S(12)    | 1.679(2)/ 1.680 | O(22)-Fe-Cl(2) | 93.53(5)/89.15   |
| C(22)-O(22)    | 1.258(2)/ 1.245 | O(21)-Fe-Cl(2) | 165.22(4)/161.51 |
| C(11)-C(21)    | 1.510(3)/1.526  | O(22)-Fe-Cl(1) | 166.04(4)/161.58 |
| C(12)-C(22)    | 1.508(3)/ 1.526 | O(21)-Fe-Cl(1) | 93.23(5)/89.16   |
|                |                 | O(21)-Fe-O(22) | 80.72(6)/79.72   |
| S(11)-Fe-O(22) | 89.35(5)/93.23  | Cl(1)-Fe-Cl(2) | 95.19(2)/105.09  |

<sup>a</sup> Calculated using 6-31G(d) as basis set.

**Table S2.** Comparison of experimental and calculated<sup>a</sup> high and low spin configurations bond lengths (Å) for **1**.

| Bond     | Experimental | B3LYP HS | OLYP HS | B3LYP LS | OLYP LS |
|----------|--------------|----------|---------|----------|---------|
| Fe-S(11) | 2.5022       | 2.585    | 2.608   | 2.389    | 2.288   |
| Fe-S(12) | 2.4595       | 2.585    | 2.608   | 2.389    | 2.288   |
| Fe-O(21) | 2.101        | 2.151    | 2.225   | 1.989    | 1.981   |
| Fe-O(22) | 2.071        | 2.151    | 2.225   | 1.989    | 1.981   |
| Fe-Cl(1) | 2.2699       | 2.224    | 2.223   | 2.227    | 2.226   |
| Fe-Cl(2) | 2.2592       | 2.224    | 2.223   | 2.227    | 2.226   |

<sup>a</sup> Calculated using 6-31G(d) as basis set.

**Table S3.** Comparison of experimental and B3LYP calculated<sup>a</sup> *high* and *low* spin configurations bond lengths (Å) and angles (°) for **2**.

|                |                              |                |                              |
|----------------|------------------------------|----------------|------------------------------|
| Fe-S(11)       | 2.5022/2.585/ <b>2.389</b>   | S(11)-Fe-O(21) | 78.13/75.90/ <b>82.54</b>    |
| Fe-S(12)       | 2.4595/2.585/ <b>2.389</b>   | S(11)-Fe-Cl(2) | 88.26/90.17/ <b>92.06</b>    |
| Fe-O(21)       | 2.101/2.151/ <b>1.989</b>    | S(11)-Fe-Cl(1) | 101.78/98.38/ <b>93.40</b>   |
| Fe-O(22)       | 2.071/2.151/ <b>1.989</b>    | S(11)-Fe-S(12) | 163.30/165.98/ <b>171.91</b> |
| Fe-Cl(1)       | 2.2699/2.224/ <b>2.227</b>   | S(12)-Fe-O(22) | 80.08/75.90/ <b>82.59</b>    |
| Fe-Cl(2)       | 2.2592/2.224/ <b>2.227</b>   | S(12)-Fe-O(21) | 87.37/93.21/ <b>91.81</b>    |
| C(11)-S(11)    | 1.675/1.680/ <b>1.686</b>    | S(12)-Fe-Cl(2) | 105.15/98.38/ <b>93.34</b>   |
| C(21)-O(21)    | 1.248/1.245/ <b>1.253</b>    | S(21)-Fe-Cl(1) | 87.13/90.15/ <b>92.11</b>    |
| C(12)-S(12)    | 1.679/1.680/ <b>1.686</b>    | O(22)-Fe-Cl(2) | 93.53/89.15/ <b>87.32</b>    |
| C(22)-O(22)    | 1.258/1.245/ <b>1.253</b>    | O(21)-Fe-Cl(2) | 165.22/161.51/ <b>174.20</b> |
| C(11)-C(21)    | 1.510/1.526/ <b>1.517</b>    | O(22)-Fe-Cl(1) | 166.04/161.58/ <b>174.29</b> |
| C(12)-C(22)    | 1.508/1.526/ <b>1.517</b>    | O(21)-Fe-Cl(1) | 93.23/89.16/ <b>87.32</b>    |
|                |                              | O(21)-Fe-O(22) | 80.72/79.72/ <b>90.70</b>    |
| S(11)-Fe-O(22) | 89.35(5)/93.23/ <b>91.65</b> | Cl(1)-Fe-Cl(2) | 95.19/105.09/ <b>95.15</b>   |

<sup>a</sup> Calculated using 6-31G(d) as basis set.

**Table S4.** Comparison of experimental and OLYP calculated<sup>a</sup> *high* and *low* spin configurations bond lengths (Å) and angles (°) for **2**.

|                |                              |                |                              |
|----------------|------------------------------|----------------|------------------------------|
| Fe-S(11)       | 2.5022/2.608/ <b>2.288</b>   | S(11)-Fe-O(21) | 78.13/ 74.52/ <b>83.63</b>   |
| Fe-S(12)       | 2.4595/2.608/ <b>2.288</b>   | S(11)-Fe-Cl(2) | 88.26/90.86/ <b>87.71</b>    |
| Fe-O(21)       | 2.101/ 2.225/ <b>1.981</b>   | S(11)-Fe-Cl(1) | 101.78/99.57/ <b>91.01</b>   |
| Fe-O(22)       | 2.071/ 2.225/ <b>1.981</b>   | S(11)-Fe-S(12) | 163.30/162.83/ <b>178.03</b> |
| Fe-Cl(1)       | 2.2699/2.223/ <b>2.226</b>   | S(12)-Fe-O(22) | 80.08/74.52/ <b>83.62</b>    |
| Fe-Cl(2)       | 2.2592/2.223/ <b>2.226</b>   | S(12)-Fe-O(21) | 87.37/92.12/ <b>97.83</b>    |
| C(11)-S(11)    | 1.675/1.681/ <b>1.690</b>    | S(12)-Fe-Cl(2) | 105.15/99.57/ <b>91.01</b>   |
| C(21)-O(21)    | 1.248/1.248/ <b>1.268</b>    | S(21)-Fe-Cl(1) | 87.13/90.86/ <b>87.71</b>    |
| C(12)-S(12)    | 1.679/ 1.681/ <b>1.690</b>   | O(22)-Fe-Cl(2) | 93.53/89.37/ <b>89.22</b>    |
| C(22)-O(22)    | 1.258/ 1.248/ <b>1.268</b>   | O(21)-Fe-Cl(2) | 165.22/160.99/ <b>168.60</b> |
| C(11)-C(21)    | 1.510/1.528/ <b>1.491</b>    | O(22)-Fe-Cl(1) | 166.04/160.99/ <b>168.59</b> |
| C(12)-C(22)    | 1.508/ 1.528/ <b>1.491</b>   | O(21)-Fe-Cl(1) | 93.23/89.37/ <b>89.23</b>    |
|                |                              | O(21)-Fe-O(22) | 80.72/79.30/ <b>84.64</b>    |
| S(11)-Fe-O(22) | 89.35(5)/92.12/ <b>97.84</b> | Cl(1)-Fe-Cl(2) | 95.19/105.27/ <b>98.36</b>   |

<sup>a</sup> Calculated using 6-31G(d) as basis set.

**Table S5.** Atomic Mulliken spin densities and relative energies of  $[\text{Fe}(\text{Me}_2\text{pipto})_2\text{Cl}_2]^+$  in doublet and sextet spin states.<sup>a</sup>

| Functional | Configuration | Fe     | O       | S       | Cl     | Relative Energy           |
|------------|---------------|--------|---------|---------|--------|---------------------------|
| B3LYP      | High Spin     | 3.8838 | 0.0397  | 0.1552  | 0.3308 | 0 kJmol <sup>-1</sup>     |
|            |               |        | 0.0397  | 0.1552  | 0.3309 |                           |
|            | Low Spin      | 1.0742 | -0.0027 | -0.0393 | 0.0048 | 99.85 kJmol <sup>-1</sup> |
|            |               |        | -0.0026 | -0.0396 | 0.0053 |                           |
| OLYP       | High Spin     | 3.7284 | 0.0366  | 0.1714  | 0.3900 | 0 kJmol <sup>-1</sup>     |
|            |               |        | 0.0366  | 0.1714  | 0.3901 |                           |
|            | Low Spin      | 1.0383 | 0.0001  | -0.0223 | 0.0561 | 94.45 kJmol <sup>-1</sup> |
|            |               |        | 0.0001  | -0.0222 | 0.0561 |                           |

<sup>a</sup>Basis set 6-311+G(d,p).

**Table S6.** Atomic Mulliken spin densities and relative energies of  $[\text{Co}(\text{Me}_2\text{pipto})_3]^{2+}$  in doublet and quartet spin states.<sup>a</sup>

| Functional | Configuration | Co     | O       | S       | Relative Energy           |
|------------|---------------|--------|---------|---------|---------------------------|
| B3LYP      | High Spin     | 2.6738 | 0.0053  | 0.0532  | 0 kJmol <sup>-1</sup>     |
|            |               |        | 0.0178  | 0.1033  |                           |
|            |               |        | 0.0291  | 0.0619  |                           |
|            | Low Spin      | 1.0197 | 0.0139  | -0.0073 | 61.72 kJmol <sup>-1</sup> |
|            |               | 0.0135 | -0.0066 |         |                           |
|            |               | 0.0051 | -0.0194 |         |                           |
| OLYP       | High Spin     | 2.5144 | 0.0132  | 0.0946  | 0 kJmol <sup>-1</sup>     |
|            |               |        | 0.0506  | 0.1316  |                           |
|            |               |        | 0.0310  | 0.1484  |                           |
|            | Low Spin      | 1.0558 | 0.0292  | -0.0024 | 7.57 kJmol <sup>-1</sup>  |
|            |               | 0.0289 | -0.0004 |         |                           |
|            |               | 0.0087 | -0.0085 |         |                           |

<sup>a</sup>Basis set 6-311+G(d,p).
